# Supplementary material for: Dissecting the genetic architecture of Fusarium verticillioides seed rot resistance in maize by combining QTL mapping and genome-wide association analysis
Source: PubMed Central journal article supplement (PMC5396065; doi:10.1038/srep46446), 2017-04-19
Supplement: srep46446-s1.pdf [file srep46446-s1.pdf]

**Dissecting the genetic architecture of *Fusarium verticillioides* seed rot resistance in maize by combining QTL mapping and genome-wide association analysis**

Ming Ju<sup>1a</sup>, Zijian Zhou<sup>1,2a</sup>, Cong Mu<sup>1</sup>, Xuecai Zhang<sup>1</sup>, Jingyang Gao<sup>3</sup>, Yakun Liang<sup>3</sup>, Jiafa Chen<sup>1</sup>, Yabin Wu<sup>1</sup>, Xiaopeng Li<sup>1</sup>, Shiwei Wang<sup>1</sup>, Jingjing Wen<sup>1</sup>, Luming Yang<sup>4\*</sup>, Jianyu Wu<sup>1\*</sup>

<sup>1</sup> College of Agronomy, Henan Agricultural University, Zhengzhou, 450002, China,

<sup>2</sup> Collaborative Innovation Center of Henan Grain Crops, Henan Agricultural University, Zhengzhou 450002, China,

<sup>3</sup> College of Life sciences, Henan Agricultural University, Zhengzhou, 450002, China,

<sup>4</sup> College of Horticulture, Henan Agricultural University, Zhengzhou, 450002, China

<sup>a</sup> These authors contributed equally to this work.

\* For correspondence:

Telephone number: 0086-371-63555785; Fax-number: 0086-371-63555790

Email: wujianyu40@126.com; ylmhort@163.com

The email addresses of all co-authors: Ming Ju, jumingzz@163.com;

Zijian Zhou, zhouzijian19900601@163.com; Cong Mu, 897021462@qq.com;

Xuecai Zhang, 46380340@qq.com; Jingyang Gao, 908985207@qq.com;

Yakun Liang, 498822409@qq.com; Jiafa Chen, 25331919@qq.com;

Yabin Wu, wuyabin1215@163.com; Xiaopeng Li, 928642314@qq.com;

Shiwei Wang, 1092646273@qq.com; Jingjing Wen, 283018646@qq.com;

Luming Yang, ylmhort@163.com; Jianyu Wu, wujianyu40@126.com.

**Table S1. Information on lines used in GWAS**

| <b>Lines of GWAS</b> | <b>Structure result</b> | <b>Pedigree information</b> | <b>The grade of disease</b> |
|----------------------|-------------------------|-----------------------------|-----------------------------|
| 2403-JIAO51          | Group 1                 | P Group                     | 5                           |
| CML103               | Group 1                 | CIMMYT                      | 5                           |
| CML108               | Group 1                 | CIMMYT                      | 2                           |
| CML11                | Group 1                 | CIMMYT                      | 4                           |
| CML113               | Group 1                 | CIMMYT                      | 3.4                         |
| CML115               | Group 1                 | CIMMYT                      | 4.2                         |
| CML116               | Group 1                 | CIMMYT                      | 5.6                         |
| CML118               | Group 1                 | CIMMYT                      | 4.8                         |
| CML121               | Group 1                 | CIMMYT                      | 4.25                        |
| CML122               | Group 1                 | CIMMYT                      | 4                           |
| CML130               | Group 1                 | CIMMYT                      | 4.6                         |
| CML134               | Group 1                 | CIMMYT                      | 3                           |
| CML139               | Group 1                 | CIMMYT                      | 3.2                         |
| CML140               | Group 1                 | CIMMYT                      | 3                           |
| CML141               | Group 1                 | CIMMYT                      | 4.4                         |
| CML142               | Group 1                 | CIMMYT                      | 4.4                         |
| CML145               | Group 1                 | CIMMYT                      | 3.8                         |
| CML147               | Group 1                 | CIMMYT                      | 6.2                         |
| CML151               | Group 1                 | CIMMYT                      | 5                           |
| CML152               | Group 1                 | CIMMYT                      | 5.4                         |
| CML153               | Group 1                 | CIMMYT                      | 4.6                         |
| CML154               | Group 1                 | CIMMYT                      | 4                           |
| CML155               | Group 1                 | CIMMYT                      | 5.2                         |
| CML156               | Group 1                 | CIMMYT                      | 7                           |
| CML157               | Group 1                 | CIMMYT                      | 6                           |
| CML158               | Group 1                 | CIMMYT                      | 3.8                         |
| CML160               | Group 1                 | CIMMYT                      | 7                           |
| CML161               | Group 1                 | CIMMYT                      | 3                           |
| CML162               | Group 1                 | CIMMYT                      | 3.8                         |
| CML163               | Group 1                 | CIMMYT                      | 3                           |
| CML164               | Group 1                 | CIMMYT                      | 4.4                         |
| CML166               | Group 1                 | CIMMYT                      | 4.75                        |
| CML169               | Group 1                 | CIMMYT                      | 0                           |
| CML170               | Group 1                 | CIMMYT                      | 3.8                         |
| CML171               | Group 1                 | CIMMYT                      | 3.75                        |
| CML172               | Group 1                 | CIMMYT                      | 4.8                         |
| CML173               | Group 1                 | CIMMYT                      | 0.8                         |
| CML174               | Group 1                 | CIMMYT                      | 4                           |
| CML175               | Group 1                 | CIMMYT                      | 5                           |
| CML179               | Group 1                 | CIMMYT                      | 6.25                        |
| CML180               | Group 1                 | CIMMYT                      | 4.25                        |

|        |         |        |      |
|--------|---------|--------|------|
| CML181 | Group 1 | CIMMYT | 2.4  |
| CML182 | Group 1 | CIMMYT | 2    |
| CML184 | Group 1 | CIMMYT | 5    |
| CML185 | Group 1 | CIMMYT | 3.6  |
| CML188 | Group 1 | CIMMYT | 4.6  |
| CML189 | Group 1 | CIMMYT | 6.4  |
| CML190 | Group 1 | CIMMYT | 4.6  |
| CML191 | Group 1 | CIMMYT | 4.4  |
| CML192 | Group 1 | CIMMYT | 2    |
| CML193 | Group 1 | CIMMYT | 1.6  |
| CML194 | Group 1 | CIMMYT | 3.4  |
| CML20  | Group 1 | CIMMYT | 5    |
| CML218 | Group 1 | CIMMYT | 1.2  |
| CML219 | Group 1 | CIMMYT | 0.6  |
| CML220 | Group 1 | CIMMYT | 4.6  |
| CML221 | Group 1 | CIMMYT | 3    |
| CML222 | Group 1 | CIMMYT | 4.4  |
| CML223 | Group 1 | CIMMYT | 2.8  |
| CML225 | Group 1 | CIMMYT | 3    |
| CML226 | Group 1 | CIMMYT | 4.2  |
| CML228 | Group 1 | CIMMYT | 5    |
| CML238 | Group 1 | CIMMYT | 0    |
| CML244 | Group 1 | CIMMYT | 4    |
| CML246 | Group 1 | CIMMYT | 5.4  |
| CML258 | Group 1 | CIMMYT | 5    |
| CML269 | Group 1 | CIMMYT | 3.5  |
| CML27  | Group 1 | CIMMYT | 4.2  |
| CML282 | Group 1 | CIMMYT | 0.4  |
| CML285 | Group 1 | CIMMYT | 2.2  |
| CML288 | Group 1 | CIMMYT | 3.6  |
| CML29  | Group 1 | CIMMYT | 3.2  |
| CML292 | Group 1 | CIMMYT | 2.2  |
| CML295 | Group 1 | CIMMYT | 5    |
| CML300 | Group 1 | CIMMYT | 2.5  |
| CML304 | Group 1 | CIMMYT | 3.8  |
| CML31  | Group 1 | CIMMYT | 4.75 |
| CML312 | Group 1 | CIMMYT | 2    |
| CML323 | Group 1 | CIMMYT | 3.6  |
| CML324 | Group 1 | CIMMYT | 2.25 |
| CML325 | Group 1 | CIMMYT | 2.4  |
| CML326 | Group 1 | CIMMYT | 5.2  |
| CML327 | Group 1 | CIMMYT | 5.6  |
| CML328 | Group 1 | CIMMYT | 2.75 |
| CML332 | Group 1 | CIMMYT | 1.8  |

|           |         |         |      |
|-----------|---------|---------|------|
| CML333    | Group 1 | CIMMYT  | 2.2  |
| CML338    | Group 1 | CIMMYT  | 3    |
| CML36     | Group 1 | CIMMYT  | 5.75 |
| CML367    | Group 1 | CIMMYT  | 3.4  |
| CML40     | Group 1 | CIMMYT  | 2.4  |
| CML410    | Group 1 | CIMMYT  | 3.8  |
| CML411    | Group 1 | CIMMYT  | 5.6  |
| CML421    | Group 1 | CIMMYT  | 2.4  |
| CML422    | Group 1 | CIMMYT  | 4.4  |
| CML424    | Group 1 | CIMMYT  | 0    |
| CML428    | Group 1 | CIMMYT  | 0    |
| CML435    | Group 1 | CIMMYT  | 3.5  |
| CML437    | Group 1 | CIMMYT  | 3.4  |
| CML438    | Group 1 | CIMMYT  | 3    |
| CML445    | Group 1 | CIMMYT  | 2.2  |
| CML469    | Group 1 | CIMMYT  | 3.6  |
| CML473    | Group 1 | CIMMYT  | 2.2  |
| CML477    | Group 1 | CIMMYT  | 2.25 |
| CML478    | Group 1 | CIMMYT  | 6    |
| CML480    | Group 1 | CIMMYT  | 0    |
| CML481    | Group 1 | CIMMYT  | 3.5  |
| CML486    | Group 1 | CIMMYT  | 1.6  |
| CML487    | Group 1 | CIMMYT  | 2    |
| CML489    | Group 1 | CIMMYT  | 1.8  |
| CML491    | Group 1 | CIMMYT  | 5    |
| CML492    | Group 1 | CIMMYT  | 6    |
| CML493    | Group 1 | CIMMYT  | 3.4  |
| CML494    | Group 1 | CIMMYT  | 2.8  |
| CML495    | Group 1 | CIMMYT  | 2.4  |
| CML496    | Group 1 | CIMMYT  | 4.75 |
| CML497    | Group 1 | CIMMYT  | 2    |
| CML52     | Group 1 | CIMMYT  | 3    |
| CML533    | Group 1 | CIMMYT  | 2.4  |
| CML538    | Group 1 | CIMMYT  | 1.2  |
| CML80     | Group 1 | CIMMYT  | 3    |
| CML84     | Group 1 | CIMMYT  | 1.4  |
| CML85     | Group 1 | CIMMYT  | 3.2  |
| CML91     | Group 1 | CIMMYT  | 2.2  |
| CML92     | Group 1 | CIMMYT  | 4.25 |
| CML96     | Group 1 | CIMMYT  | 3    |
| CML99     | Group 1 | CIMMYT  | 1.8  |
| CML178    | Group 3 | CIMMYT  | 6    |
| 2369-BT-1 | Group 2 | Special | 1.4  |
| 2116-2437 | Group 2 | TSPT    | 1.8  |

|                 |         |              |      |
|-----------------|---------|--------------|------|
| W444            | Group 2 | TSPT         | 2    |
| 12H647-1-TSPT1  | Group 2 | TSPT         | 2.4  |
| 2115-2434       | Group 2 | TSPT         | 2.4  |
| 12H567-1-TSPT24 | Group 2 | TSPT         | 2.75 |
| 12H650-1-TSPT4  | Group 2 | TSPT         | 2.8  |
| 2123-2344-5     | Group 2 | TSPT         | 3    |
| 2406-ST255      | Group 2 | (BT-1×N6)RIL | 3    |
| CHANG7-2        | Group 2 | TSPT         | 3.4  |
| 12H560-1-TSPT10 | Group 2 | TSPT         | 3.8  |
| 12H556-1-TSPT9  | Group 2 | TSPT         | 4    |
| 12H568-1-TSPT25 | Group 2 | TSPT         | 4    |
| 12H574-1-TSPT15 | Group 2 | TSPT         | 4    |
| 12H652-1-TSPT5  | Group 2 | TSPT         | 4    |
| 12H562-1-TSPT12 | Group 2 | TSPT         | 4.2  |
| 12H565-1-TSPT22 | Group 2 | TSPT         | 4.2  |
| 12H644-1-TSPT18 | Group 2 | TSPT         | 4.2  |
| 12H561-1-TSPT11 | Group 2 | TSPT         | 4.4  |
| 12H572-1-TSPT14 | Group 2 | TSPT         | 4.4  |
| 12Z413-2-TSPT3  | Group 2 | TSPT         | 4.4  |
| 444             | Group 2 | TSPT         | 4.8  |
| 2378-N6         | Group 2 | TSPT         | 5.6  |
| 12H495-1-TSPT19 | Group 2 | TSPT         | 6.4  |
| XI502           | Group 2 | TSPT         | 6.4  |
| R136            | Group 2 | (BT-1×N6)RIL | 0.4  |
| R166            | Group 2 | (BT-1×N6)RIL | 1.4  |
| R180            | Group 2 | (BT-1×N6)RIL | 1.4  |
| R55             | Group 2 | (BT-1×N6)RIL | 2.4  |
| R205            | Group 2 | (BT-1×N6)RIL | 2.4  |
| R62             | Group 2 | (BT-1×N6)RIL | 2.6  |
| R43             | Group 2 | (BT-1×N6)RIL | 3    |
| R83             | Group 2 | (BT-1×N6)RIL | 3    |
| R132            | Group 2 | (BT-1×N6)RIL | 3    |
| R123            | Group 2 | (BT-1×N6)RIL | 3.2  |
| R201            | Group 2 | (BT-1×N6)RIL | 3.2  |
| R15             | Group 2 | (BT-1×N6)RIL | 3.4  |
| R230            | Group 2 | (BT-1×N6)RIL | 3.4  |
| R235            | Group 2 | (BT-1×N6)RIL | 3.4  |
| R30             | Group 2 | (BT-1×N6)RIL | 3.6  |
| R104            | Group 2 | (BT-1×N6)RIL | 3.6  |
| R137            | Group 2 | (BT-1×N6)RIL | 3.75 |
| R40             | Group 2 | (BT-1×N6)RIL | 4    |
| R87             | Group 2 | (BT-1×N6)RIL | 4    |
| R92             | Group 2 | (BT-1×N6)RIL | 4    |
| R130            | Group 2 | (BT-1×N6)RIL | 4    |

|                    |             |               |      |
|--------------------|-------------|---------------|------|
| R165               | Group 2     | (BT-1 ×N6)RIL | 4    |
| R193               | Group 2     | (BT-1 ×N6)RIL | 4    |
| R214               | Group 2     | (BT-1 ×N6)RIL | 4.6  |
| R99                | Group 2     | (BT-1 ×N6)RIL | 4.8  |
| R22                | Group 2     | (BT-1 ×N6)RIL | 5    |
| R188               | Group 2     | (BT-1 ×N6)RIL | 5    |
| 12H692-1-P Group2  | Group 3     | P Group       | 0.4  |
| 12H378-1-Lan6      | Group 3     | Lancaster     | 1.4  |
| 12H583-1-Reid15    | Group 3     | Reid          | 1.8  |
| 12H685-1-P Group11 | Group 3     | P Group       | 1.8  |
| 12H664-1-Reid10    | Group 3     | Reid          | 2.6  |
| 12H580-1-Reid13    | Group 3     | Reid          | 2.8  |
| 2193-2013-32       | Group 3     | Reid          | 2.8  |
| 12H691-1-Lan1      | Group 3     | Lancaster     | 3    |
| 12HR707-1-P Group4 | Group 3     | P Group       | 3    |
| ZHENG58            | Group 3     | Reid          | 3    |
| 12H605-1-Reid9     | Group 3     | Reid          | 3.2  |
| 12H678-1-Reid2     | Group 3     | Reid          | 3.2  |
| 12H690-1-P Group1  | Group 3     | P Group       | 3.2  |
| 2203-2126-15       | Group 3     | Reid          | 3.2  |
| 12H640-1-P Group6  | Group 3     | P Group       | 3.25 |
| 2192-2013-24       | Group 3     | Reid          | 3.25 |
| 12H602-1-P Group9  | Group 3     | P Group       | 3.6  |
| 12H623-1-P Group8  | Group 3     | P Group       | 3.6  |
| 12H642-1-P Group17 | Group 3     | P Group       | 4    |
| 12H683-1-Reid3     | Group 3     | Reid          | 4    |
| 12HR711-1-Lan2     | Group 3     | Lancaster     | 4    |
| 913-Mo17           | Group 3     | Lancaster     | 4    |
| 12H413-1-P Group13 | Group 3     | P Group       | 4.25 |
| 12H588-1-Reid18    | Group 3     | Reid          | 4.4  |
| 12H457-1-P Group14 | Group 3     | P Group       | 4.5  |
| 2399-72            | Group 3     | Lancaster     | 4.5  |
| 12H621-1-Reid4     | Group 3     | Reid          | 4.6  |
| 2204-2126-29       | Group 3     | Reid          | 4.6  |
| 2397-276           | Group 3     | Reid          | 4.75 |
| 12H686-1-P Group3  | Group 3     | P Group       | 4.8  |
| 12H603-1-Reid8     | Group 3     | Reid          | 5    |
| 12HR714-1-Lv1      | Group 3     | Luda Red Cob  | 5    |
| 12H667-1-Reid11    | Group 3     | Reid          | 5.2  |
| 12H641-1-P Group7  | Group 3     | P Group       | 5.6  |
| 12H698-1-P Group12 | mixed group | P Group       | 4.6  |
| 12H577-1-Reid6     | mixed group | Reid          | 4    |
| R91-(BT-N6)RIL106  | mixed group | (BT-1 ×N6)RIL | 3.8  |

**Table S2. Physical positions of partial SNPs significantly associated with FSR resistance and the predicted function or homology of candidate genes.**

| <b>Marker</b>   | <b>P-value</b> | <b>Resistant allele</b> | <b>R<sup>2</sup></b> | <b>Gene</b>      | <b>Annotation</b> |
|-----------------|----------------|-------------------------|----------------------|------------------|-------------------|
| Chr.1_202169556 | 0.000413       | T                       | 0.066                | GRMZM2G123016    | expressed protein |
| Chr.6_140711920 | 0.000438       | G                       | 0.064                | GRMZM2G093325    | expressed protein |
| Chr.6_154335211 | 0.000376       | C                       | 0.062                | GRMZM2G701206    | expressed protein |
| Chr.7_86275599  | 0.00026        | A                       | 0.077                | AC187460.4_FG002 | expressed protein |
| Chr.9_109115056 | 0.00026        | C                       | 0.07                 | GRMZM2G103900    | expressed protein |
| Chr.9_109115169 | 0.000238       | C                       | 0.07                 |                  |                   |
| Chr.9_109115172 | 0.000264       | C                       | 0.07                 |                  |                   |
| Chr.2_15283638  | 0.00044        | C                       | 0.068                | GRMZM2G341111    | Non-coding gene   |
| Chr.6_150940467 | 0.000445       | A                       | 0.068                | AC208912.2_FG003 | Non-coding gene   |
| Chr.8_172132198 | 0.000406       | A                       | 0.07                 | GRMZM2G417795    | Non-coding gene   |
| Chr.9_59770427  | 0.000354       | C                       | 0.067                | GRMZM5G846832    | Non-coding gene   |
| Chr.7_156316378 | 0.0000855      | A                       | 0.076                | NO               | NO                |

R<sup>2</sup> represent proportion of phenotypic variance explained by SNP.

**Table S3. Descriptive Statistics and correlations between FSR and FER of 100 maize lines.**

| <b>Disease<br/>Resistance</b> | <b>Mean</b> | <b>Std.Deviation</b> | <b>N</b> | <b>Pearson Correlation</b> |            |
|-------------------------------|-------------|----------------------|----------|----------------------------|------------|
|                               |             |                      |          | <b>FSR</b>                 | <b>FER</b> |
| FSR                           | 3.5868      | 1.2663               | 100      | 1                          | 0.148      |
| FER                           | 0.0402      | 0.06085              | 100      | 0.148                      | 1          |



**Table S4. Evaluation standard of *F. verticillioides* seed rot resistance in maize.**

| Grades of diseases | Symptom Descriptions in one petri dish with 10 seeds                                |
|--------------------|-------------------------------------------------------------------------------------|
| 0                  | SN = 0 and IA = 0%                                                                  |
| 1                  | $0 < SN \leq 2$ and $0 < IA \leq 25\%$                                              |
| 2                  | SN=2 and IA > 25% or $3 \leq SN < 7$ and $0 < IA < 25\%$                            |
| 3                  | $3 \leq SN < 7$ and $25\% \leq IA < 50\%$ , or $SN \geq 7$ and $0 < IA < 25\%$      |
| 4                  | $3 \leq SN < 7$ and $50\% \leq IA < 75\%$ , or $SN \geq 7$ and $25 \leq IA < 50\%$  |
| 5                  | $3 \leq SN < 7$ and $75\% \leq IA < 100\%$ , or $SN \geq 7$ and $50 \leq IA < 75\%$ |
| 6                  | $3 \leq SN < 7$ and IA=100% , or $SN \geq 7$ and $75 \leq IA < 100\%$               |
| 7                  | SN=10 and IA=100%                                                                   |

Note: SN-symptom diseased seed number; IA- seed incidence area / seed total area

**Table S5. Primer used in qRT-PCR.**

| Gene                               |            | Primer (5'-3')         |
|------------------------------------|------------|------------------------|
| <i>Beta-actin</i> (reference gene) | Sense      | CGATTGAGCATGGCATTGTCA  |
|                                    | Anti-sense | CCCCTAGCGTACAACGAA     |
| <i>GRMZM2G0081223</i>              | Sense      | GCTGTGATGACCGTGGTGTTC  |
|                                    | Anti-sense | CCTGGCTGATGATGCTGACTTG |
| <i>AC213654.3_FG004</i>            | Sense      | TACGTCTGCGTCAGCGGACA   |
|                                    | Anti-sense | TGGAAGCGTCATCCTCGGAGTC |
| <i>GRMZM2G099255</i>               | Sense      | ACACCCAGTTTATTGCCATTT  |
|                                    | Anti-sense | GCCCCATATCACCTTTTCG    |

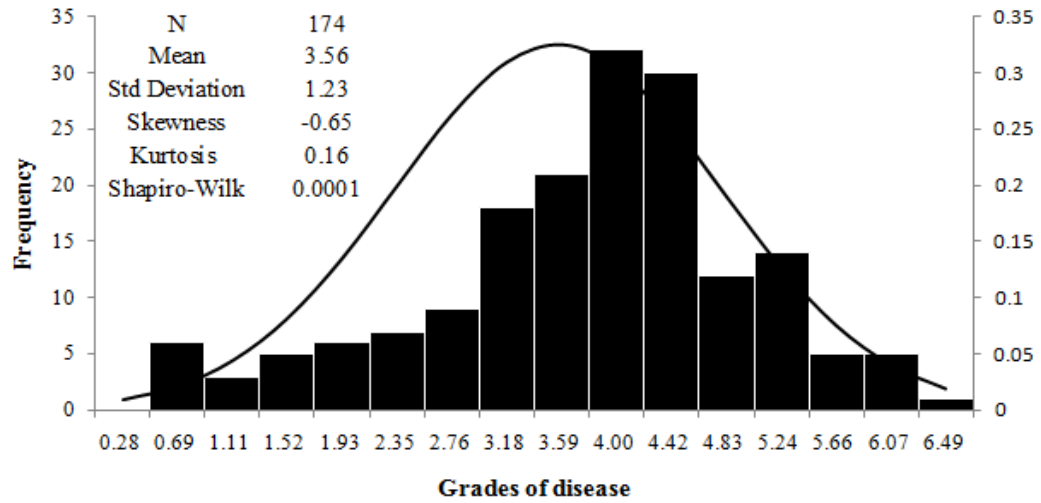

**Figure S1. The frequency distribution of grades of disease of 174 individuals in RIL population.**

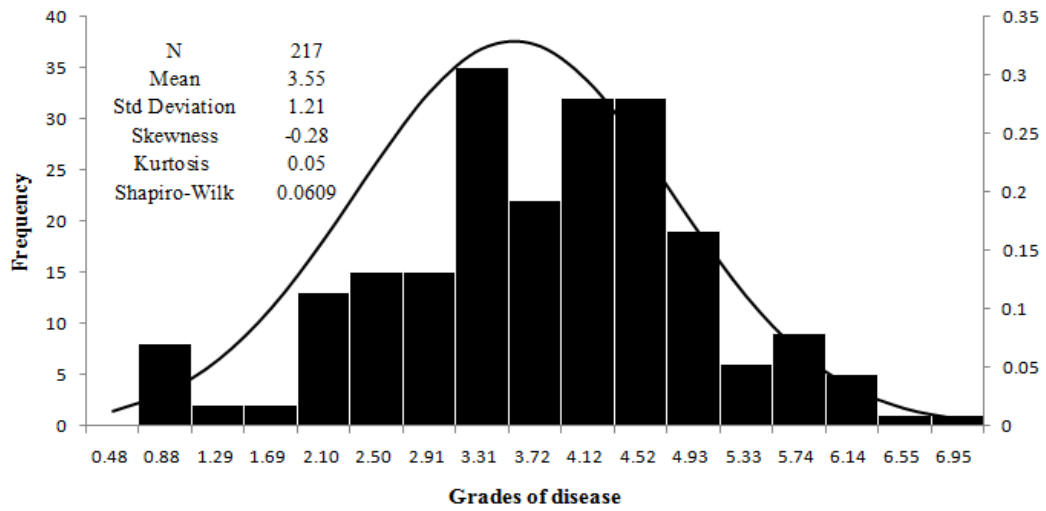

**Figure S2.** The frequency distribution of grades of disease of 217 maize lines in the association mapping panel.

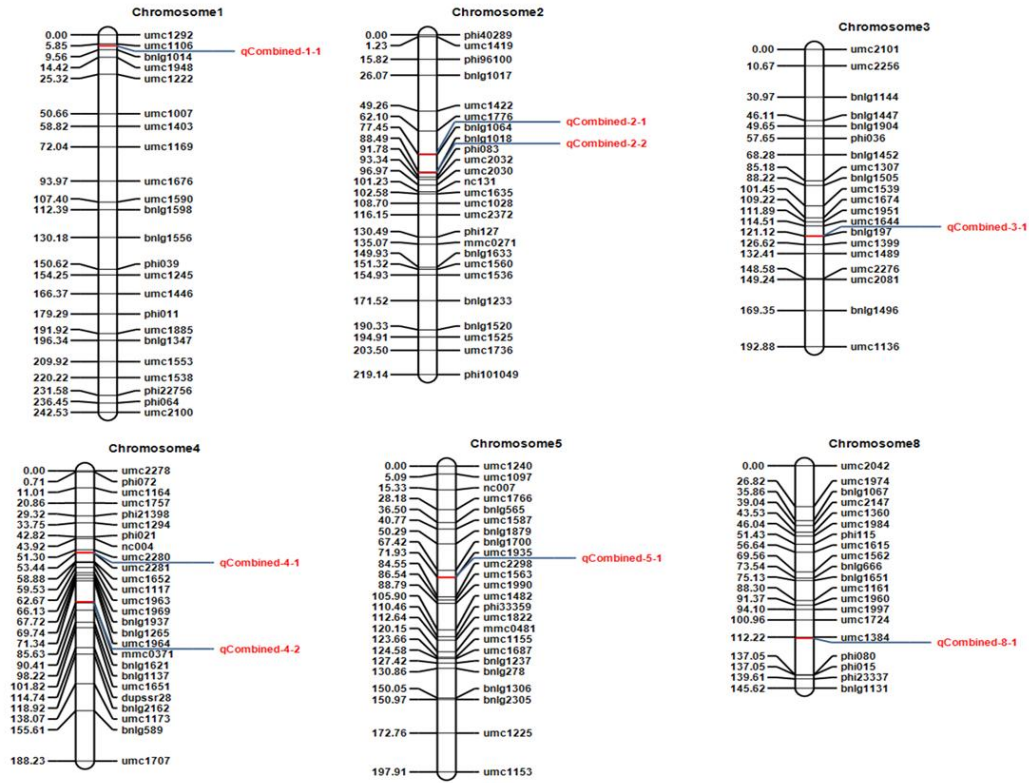

**Figure S3. Eight QTLs (PVE: 4.07-12.06%, LOD: 2.57-6.96) associated with the resistance to *F. verticillioides* seed rot on six chromosomes using 174 F<sub>9:10</sub> mapping population (BT-1 × N6) of maize.**

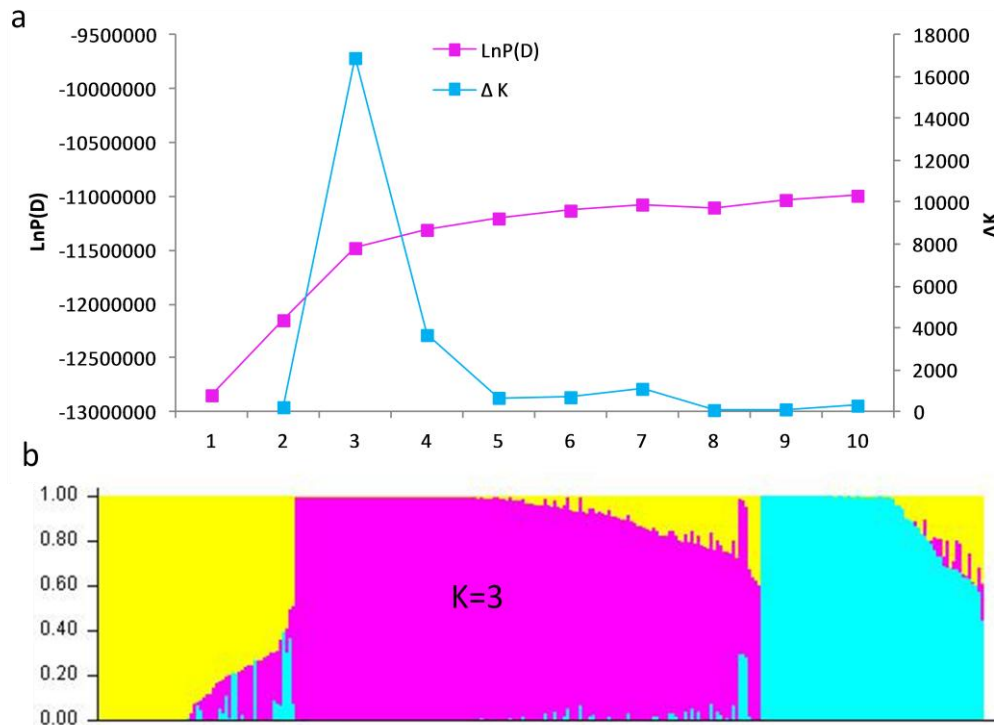

**Figure S4. Population structure of 217 maize inbred lines based on 5000 SNP markers:** (a) Plot of LnP(D) and an ad hoc statistic  $\Delta K$  calculated for K ranging from 1 to 10; (b) population structure of the 217 lines when K=3. Each individual is represented by a single vertical line that is partitioned into K colored segments (K=3) in the x-axis, with lengths proportional to the estimated probability membership (y-axis) to each of the K inferred clusters.

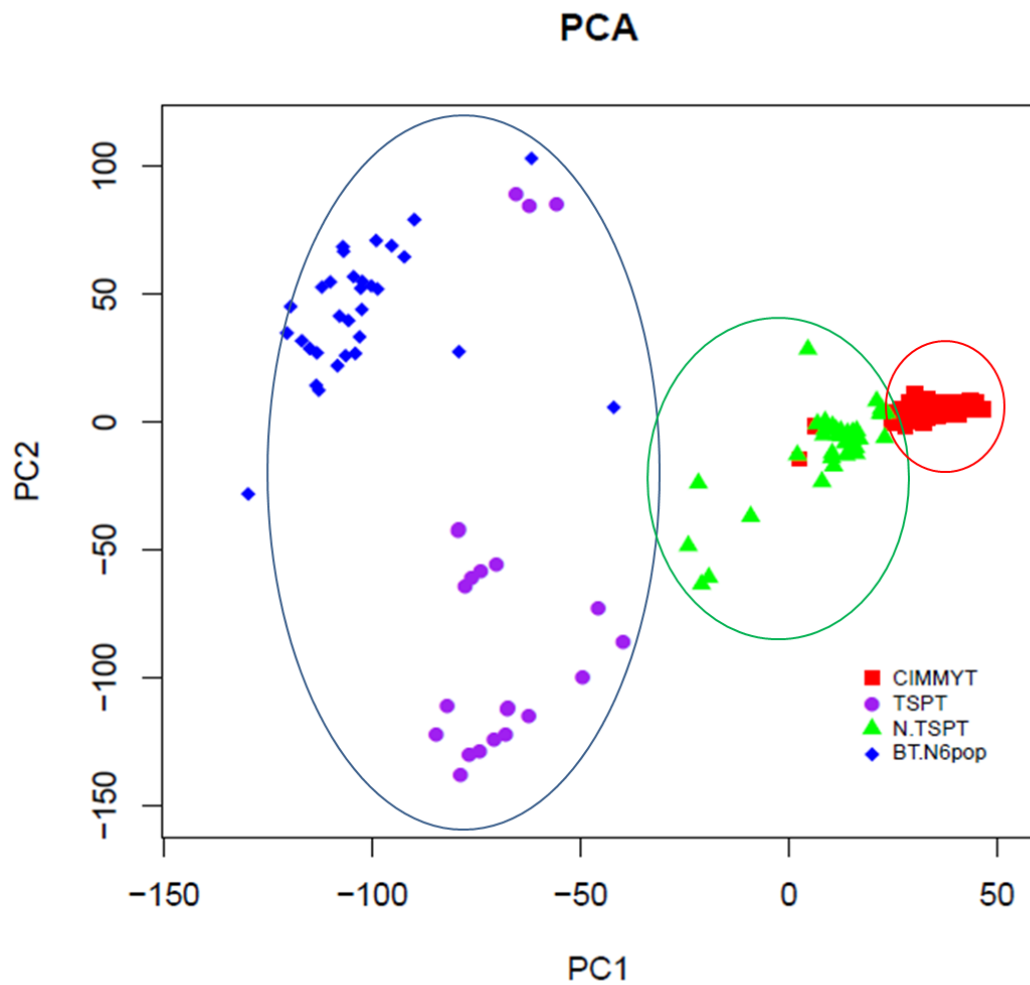

**Figure S5. The principal component analysis (PCA) of association mapping panel.**

CIMMYT represents maize lines collected from CIMMYT; TSPT represents maize lines from Tang Si Ping Tou blood of China materials; N.TSPT represents maize lines from Reid and Lancaster related materials; BT.N6pop represents maize lines from bi-parental of BT-1 and N6 RIL population.

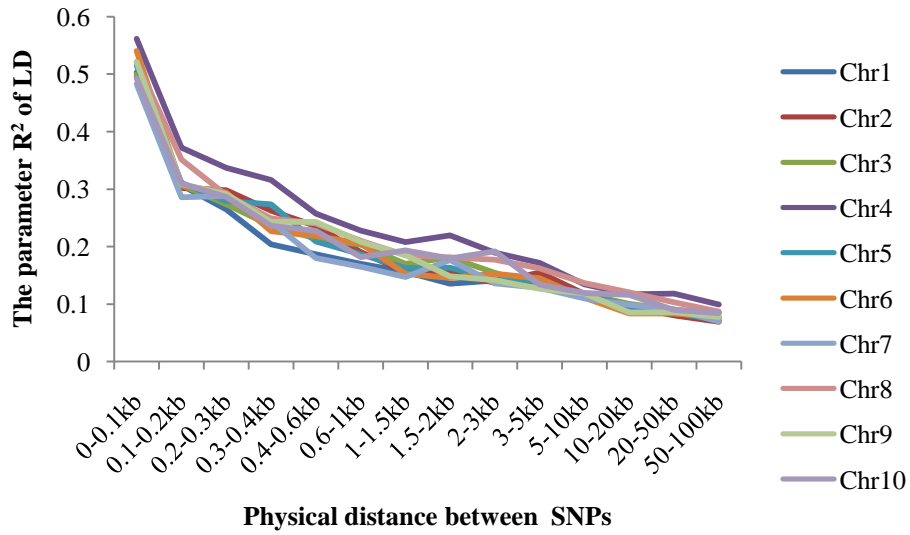

**Figure S6. LD decay across 10 chromosomes in maize.** The X-axis indicates the physical distance between SNPs within the same chromosome and the Y-axis indicates the parameter  $R^2$  of LD.



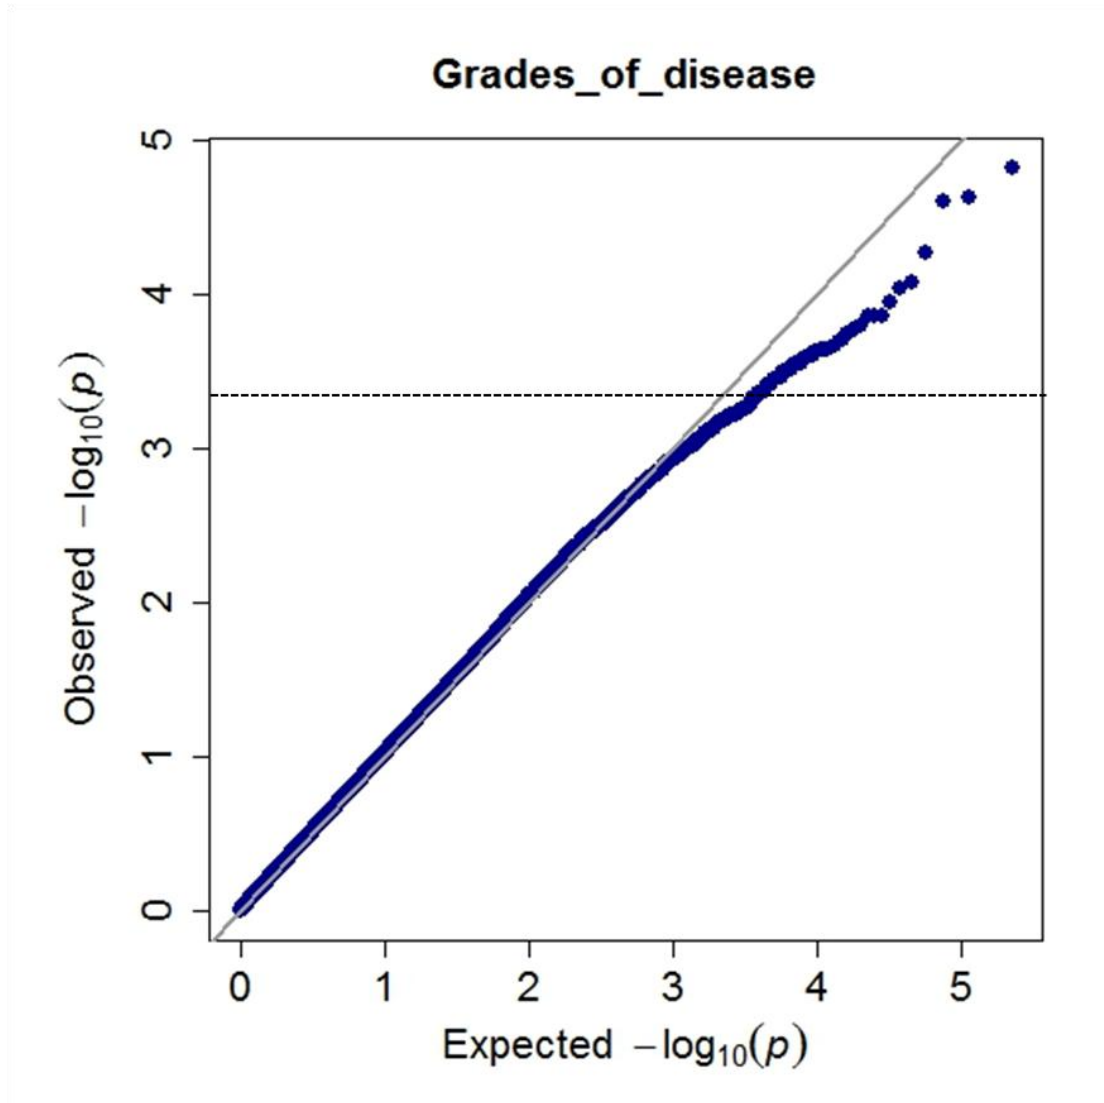

Figure S7. QQ plots from the GWAS results for the grades of disease of *F. verticillioides* seed rot resistance. Plots above the imaginary line show the genome-wide significance with a moderately stringent threshold of 100/number of SNPs.

|      |                                                                                    |     |
|------|------------------------------------------------------------------------------------|-----|
| BT-1 | MEMTSAMELSLEQIRKEAVDLENISMEEVFAFLKCCREGLSTEEAQRVLMFGPNKLEERKESKVLKFLMFMWNPLSWVM    | 80  |
| N6   | MEMTSAMELSLEQIRKEAVDLENISMEEVFAFLKCCREGLSTEEAQRVLMFGPNKLEERKESKVLKFLMFMWNPLSWVM    | 80  |
| BT-1 | EMAAVMAIALANGDNRPDPWQDFVGIIVLLVINSTISFVEENNAGSAAEALMANLAPKTKVLRIDGQWSEEDA AVLVPGDI | 160 |
| N6   | EMAAVMAIALANGDNRPDPWQDFVGIIVLLVINSTISFVEENNAGSAAEALMANLAPKTKVLRIDGQWSEEDA AVLVPGDI | 160 |
| BT-1 | ISIRLGDIVPADARLLEGDAKIDQSALTGECLPVTRSPGSSVYSGSTCKQGEIEAVVIATGVHTFFGKAAHLVDSTNQV    | 240 |
| N6   | ISIRLGDIVPADARLLEGDAKIDQSALTGECLPVTRSPGSSVYSGSTCKQGEIEAVVIATGVHTFFGKAAHLVDSTNQV    | 240 |
| BT-1 | GHFQKVLKAIGNFCIGAIAMGVIVEVVVMYAVQHRRYREGIDNLLVLLIGGPIAMPTVLSVTMAIGSHKLSLQGAITKR    | 320 |
| N6   | GHFQKVLKAIGNFCIGAIAMGVIVEVVVMYAVQHRRYREGIDNLLVLLIGGPIAMPTVLSVTMAIGSHKLSLQGAITKR    | 320 |
| BT-1 | MTATEEMAGMDVLCSDRTGTLTLNKLSDRTLVEIFAAGVTKDDVILFAARASRVENQDAIDAAMVGMIGDPKEARDGIE    | 400 |
| N6   | MTATEEMAGMDVLCSDRTGTLTLNKLSDRTLVEIFAAGVTKDDVILFAARASRVENQDAIDAAMVGMIGDPKEARDGIE    | 400 |
| BT-1 | EVHFFPFNVDKRTALTYIDLADGSWHRVSKGAPEQILALCNCGDDVCLVHTVIDKYAERGLRSLAVARQQVPEKSKES     | 480 |
| N6   | EVHFFPFNVDKRTALTYIDLADGSWHRVSKGAPEQILALCNCGDDVCLVHTVIDKYAERGLRSLAVARQQVPEKSKES     | 480 |
| BT-1 | LGDFWFEVGLLPLLDPPRSDDSTIKRALDLGVNVKMITGTPRIPRGFFHSRCYVLTCE.....ACIAGDQLAIKAKETGR   | 555 |
| N6   | LGDFWFEVGLLPLLDPPRSDDSTIKRALDLGVNVKMITGTPRIPRGFFHSRCYVLTMAHTTQEFACIAGDQLAIKAKETGR  | 560 |
| BT-1 | RLGMGTNMYPSSALLGQSKDEATASVPVDDLIEKADGFAGVFEHKEYEIVKRLQEMKHICGMTGDGVNDAPALKKADIGI   | 635 |
| N6   | RLGMGTNMYPSSALLGQSKDEATASVPVDDLIEKADGFAGVFEHKEYEIVKRLQEMKHICGMTGDGVNDAPALKKADIGI   | 640 |
| BT-1 | AVAGATDAARSASDIVLTQEGLSVIISAVLTSRAIFQRMKNYTIYAVSITIRIVLGFLLIALIWKFDSPFMILVIAILN    | 715 |
| N6   | AVAGATDAARSASDIVLTQEGLSVIISAVLTSRAIFQRMKNYTIYAVSITIRIVLGFLLIALIWKFDSPFMILVIAILN    | 720 |
| BT-1 | DGTIMTIAKDRVKPSELPSWLNEIFATGVVYGTVMVMTVVFFWAMRSTDFFSNTFHVRSRLRGSTEEMMSALYLQVSI     | 795 |
| N6   | DGTIMTIAKDRVKPSELPSWLNEIFATGVVYGTVMVMTVVFFWAMRSTDFFSNTFHVRSRLRGSTEEMMSALYLQVSI     | 800 |
| BT-1 | ISQALIFVTRSRSWCFAERPGFLLCAAFVIAQIVATLIAVWADFGFAHIRGIGWGAGVIWLYSVVTFVPLDLFKFAIRY    | 875 |
| N6   | ISQALIFVTRSRSWCFAERPGFLLCAAFVIAQIVATLIAVWADFGFAHIRGIGWGAGVIWLYSVVTFVPLDLFKFAIRY    | 880 |
| BT-1 | VLAGKAWNNLLCNKTAFTTKKNYGGEERMAQWATTQRS LHGLPVTEEAGGRRSGSFVELSEVAEQARRAEFARLREKN    | 955 |
| N6   | VLAGKAWNNLLCNKTAFTTKKNYGGEERMAQWATTQRS LHGLPVTEEAGGRRSGSFVELSEVAEQARRAEFARLREKN    | 960 |
| BT-1 | TLRGQLESSARLRGVDLNAIKSPFFYS                                                        | 981 |
| N6   | TLRGQLESSARLRGVDLNAIKSPFFYS                                                        | 986 |

**Figure S8. Sequence alignment of *GRMZM2G0081223* between the parental lines BT-1 and N6.**

|      |                                                                                   |     |
|------|-----------------------------------------------------------------------------------|-----|
| BT-1 | .....MFMAPRHLGRSRPAPTPKPFGEHAKWSTTRVSDRAYSILYLLHPPCHCPLRALHRLGRSSRTLWLGAMSEG      | 72  |
| N6   | MPEWPFVKRRMAPRHLGRSRPAPTPKPFGEHAKWSTTRVSDRAYSILYLLHPPCHCPLRALHRLGRSSRTLWLGAMSEG   | 80  |
| BT-1 | ARNTRQFFAASTSGSGSSSATYRDGGGGIGVARASLVNTGILDENVLALVFRYLNFDPRALCTVSCVSRRLRAVAERVLW  | 152 |
| N6   | ARNTRQFFAASTSGSGSSSATYRDGGGGIGVARASLVNTGILDENVLALVFRYLNFDPRALCTVSCVSRRLRAVAERVLW  | 160 |
| BT-1 | RELCVSRAPRMVASLAGGGAPFGRVVGWPALAKLLFCGAAAAAVRGHFTGVSRSFKTSGRSFLSRRCRGDLLYVSDP     | 232 |
| N6   | RELCVSRAPRMVASLAGGGAPFGRVVGWPALAKLLFCGAAAAAVRGHFTGVSRSFKTSGRSFLSRRCRGDLLYVSDP     | 240 |
| BT-1 | CEHAVHGADDDVGAYRGVFRGFTRSRFRACLVGRRAPLETRVRCPCYCGARVWMSVAAGMAPRSACRRLGAHEGRLQYYVC | 312 |
| N6   | CEHAVHGADDDVGAYRGVFRGFTRSRFRACLVGRRAPLETRVRCPCYCGARVWMSVAAGMAPRSACRRLGAHEGRLQYYVC | 320 |
| BT-1 | VSGHLHGNCWLARLTSSDADRDA SEDDASTEGGDDGAHVA                                         | 353 |
| N6   | VSGHLHGNCWLARLTSSDADRDA SEDDASTEGGDDGAHVA                                         | 361 |

**Figure S9. Sequence alignment of *AC213654.3\_FG004* between the parental lines**

**BT-1 and N6.**

|      |                                                                                   |     |
|------|-----------------------------------------------------------------------------------|-----|
| BT-1 | MAPRSRAPSRRELWFIVLVAFVVCVVAIGAYLYTPQHYTACYLVPSEACNSRPPPEPARVYTDEIAARVIMRDIIRARPV  | 80  |
| N6   | MAPRSRAPSRRELWFIVLVAFVVCVVAIGAYLYTPQHYTACYLVPSEACNSRPPPEPARVYTDEIAARVIMRDIIRARPV  | 80  |
| BT-1 | QSKNTKIAFMFLTPSLLPFEKLWEKFFMGHEDRYTIYVHASRDIPSHSSPIFAGRDIRSEKVIWGTISMLDAEKRLLAHA  | 160 |
| N6   | QSKNTKIAFMFLTPSLLPFEKLWEKFFMGHEDRYTIYVHASRDIPSHSSPIFAGRDIRSEKVIWGTISMLDAEKRLLAHA  | 160 |
| BT-1 | LQDPENQH FVLLSESCVPLHNFYIYSYLMETNVSFVDCFDDEPGPHGAGRYSEHMLPEIVKRDWRKGAQWFTVQRQHAIL | 240 |
| N6   | LQDPENQH FVLLSESCVPLHNFYIYSYLMETNVSFVDCFDDEPGPHGAGRYSEHMLPEIVKRDWRKGAQWFTVQRQHAIL | 240 |
| BT-1 | ILADTLYYGKFKRYCKPGNEWHNCYSDEHYLPTLFNVSVQKLAELLFSSISQHEILPR..                      | 298 |
| N6   | ILADTLYYGKFKRYCKPGSEWHNCYSDEHYLPTLFNVSVQKLAELFCSLRSANNIEYREKK                     | 300 |

**Figure S10. Sequence alignment of *GRMZM2G099255* between the parental lines BT-1 and N6.**

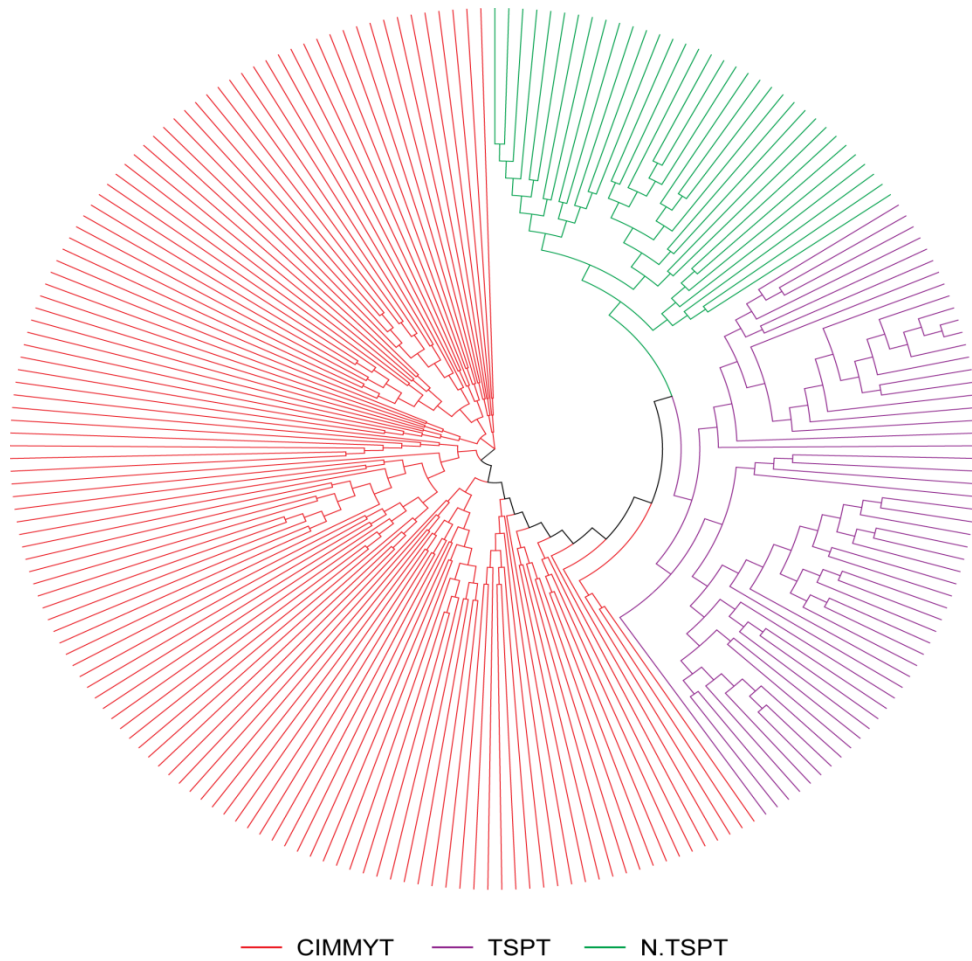

**Figure S11. The phylogenetic tree of association panel based on neighbor joining (NJ) method.** CIMMYT represents these maize lines collected from CIMMYT; TSPT represents these lines from Tang Si Ping Tou blood of China materials and some material from BT.N6pop; N.TSPT represents these lines from Reid and Lancaster related materials.

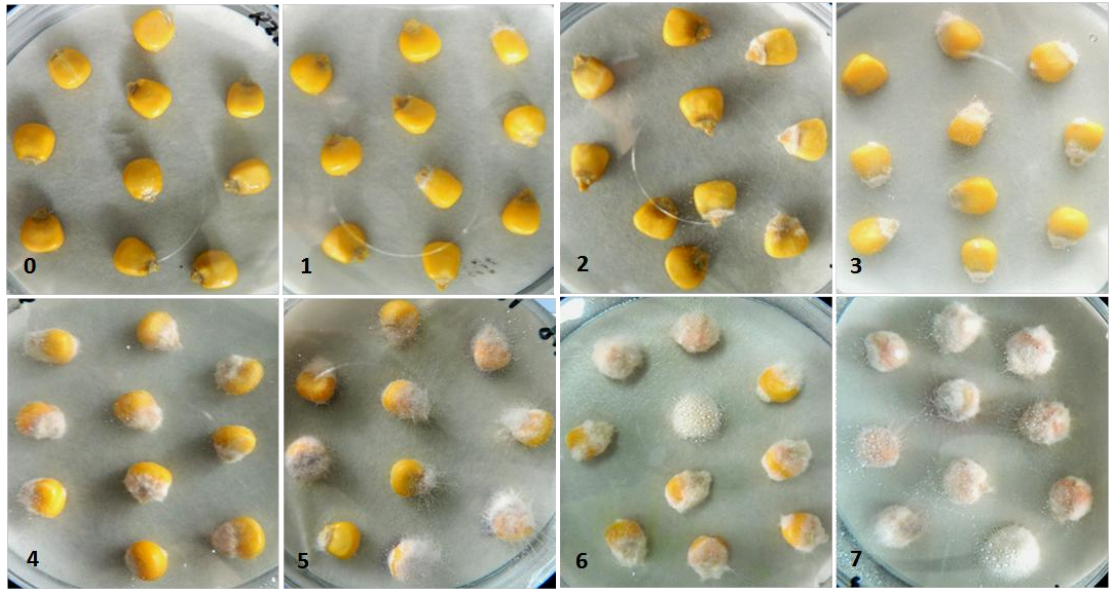

**Figure S12. Symptom of maize seeds resistance to *F. verticillioides* in one petri dish.** Note: 0-7 represents the grades of diseases, respectively.

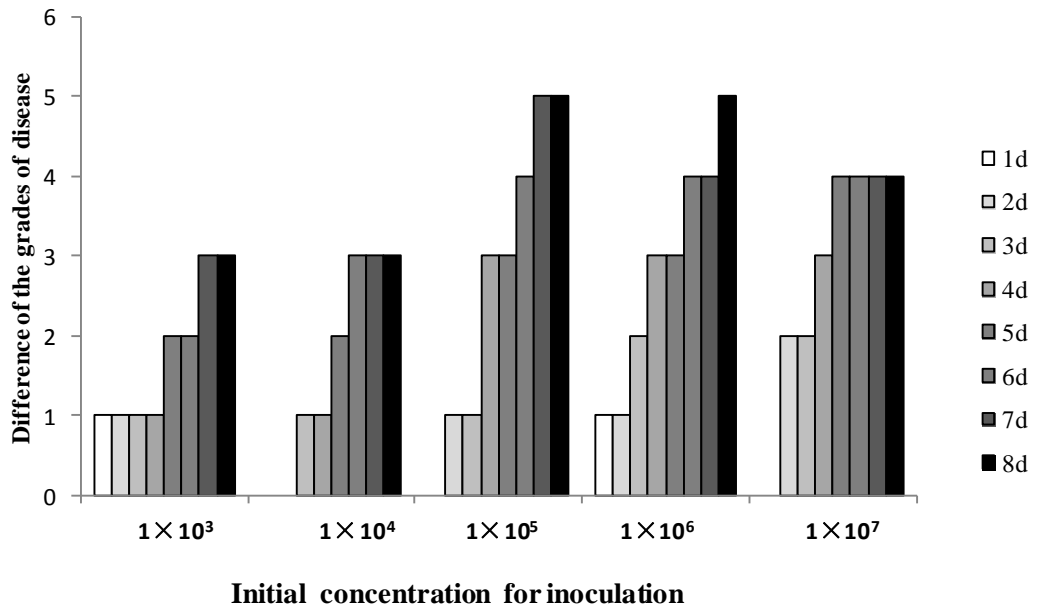

**Figure S13. Difference of the grades of disease between BT-1 and N6 under different spore concentration and different period.**
